# Supplementary material for: Evaluation of Effectiveness and Cost‐Effectiveness of a Clinical Decision Support System in Managing Hypertension in Resource Constrained Primary Health Care Settings: Results From a Cluster Randomized Trial
Source: PubMed Central journal article supplement — J Am Heart Assoc. 2015 Jan 5;4(1):e001213. doi: 10.1161/JAHA.114.001213 (PMC4330052; doi:10.1161/jaha.114.001213), 2015-01-05
Supplement: jah3-4-e001213-s1.pdf [file jah3-4-e001213-s1.pdf]

## SUPPLEMENTAL MATERIAL

**Table S1: Referral criteria to a higher secondary or tertiary health care center**

| <b>Referral criteria</b>                                                                                                                                                                                                                                                                                                                                                                                                                                                                                                                                                                                                                                                                                                                                                                                                                                                                                                                                                                                     |
|--------------------------------------------------------------------------------------------------------------------------------------------------------------------------------------------------------------------------------------------------------------------------------------------------------------------------------------------------------------------------------------------------------------------------------------------------------------------------------------------------------------------------------------------------------------------------------------------------------------------------------------------------------------------------------------------------------------------------------------------------------------------------------------------------------------------------------------------------------------------------------------------------------------------------------------------------------------------------------------------------------------|
| <ul style="list-style-type: none"><li>• History of heart disease (any history of heart attack, angina, heart failure, any surgical procedure on coronary vessels, i.e. CABG or PTCA)</li><li>• History of stroke or Transient Ischemic attack</li><li>• Co morbid diabetes and hypertension</li><li>• History of Renal disease (renal failure - S. creatinine&gt;2 mg/dl; or diabetic nephropathy)</li><li>• History of vascular disease (peripheral arterial disease, eg, claudication; or aortic dissection)</li><li>• Any evidence of LVH (on an ECG or an echocardiogram)</li><li>• Any evidence of microalbuminuria or proteinuria and or elevation of serum creatinine (1.2-2.0mg/dl)</li><li>• Any evidence of atherosclerotic plaques in the carotids (ultrasound or radiological)</li><li>• Any evidence of hypertensive retinopathy</li><li>• Any of the Physician certified co-morbid conditions such as PVD, Kidney disease, Diabetes, Heart failure, CVD, MI, Arthritis, COPD, Asthma</li></ul> |
